# Supplementary material
Source: PubMed Central journal article supplement (PMC10259677)
Supplement: NIHMS1781877-supplement-Supporting_Material.pdf [file NIHMS1781877-supplement-Supporting_Material.pdf]

1 **Supporting Information for Assessing unconventional oil and gas exposure in the Appalachian**  
2 **Basin: Comparison of exposure surrogates and residential drinking water measurements**

3  
4 Cassandra J. Clark<sup>1</sup>, Boya Xiong<sup>2,3</sup>, Mario A. Soriano, Jr.<sup>4</sup>, Kristina Gutches<sup>4</sup>, Helen G. Siegel<sup>4</sup>,  
5 Emma C. Ryan<sup>5</sup>, Nicholaus P. Johnson<sup>1</sup>, Kelsie Cassell<sup>6</sup>, Elise G. Elliott<sup>1,7,8</sup>, Yunpo Li<sup>2</sup>, Austin J. Cox<sup>2</sup>,  
6 Nicolette Bugher<sup>2</sup>, Lukas Glist<sup>2</sup>, Rebecca J. Brenneis<sup>2</sup>, Keli M. Sorrentino<sup>9</sup>, Julie Plano<sup>9</sup>, Xiaomei  
7 Ma<sup>10</sup>, Joshua L. Warren<sup>11</sup>, Desiree L. Plata<sup>2</sup>, James E. Saiers<sup>4</sup>, and Nicole C. Deziel<sup>1</sup>

8  
9 <sup>1</sup> Yale School of Public Health, Department of Environmental Health Sciences, 60 College St., New  
10 Haven, Connecticut 06510, USA

11 <sup>2</sup> Massachusetts Institute of Technology, Department of Civil and Environmental Engineering, Parsons  
12 Laboratory, 15 Vassar Street, Cambridge Massachusetts 02139, USA

13 <sup>3</sup> University of Minnesota, Department of Civil, Environmental and Geo-Engineering, 500 Pillsbury Dr.  
14 SE, Minneapolis, MN 55455, USA

15 <sup>4</sup> Yale School of the Environment, 195 Prospect Street, New Haven, Connecticut 06511, USA

16 <sup>5</sup> Tufts University, Department of Public Health and Community Medicine, 136 Harrison Avenue,  
17 Boston, MA 02111, USA

18 <sup>6</sup> Yale School of Public Health, Department of Epidemiology of Microbial Diseases, 60 College St.,  
19 New Haven, Connecticut 06510, USA

20 <sup>7</sup> Harvard T.H. Chan School of Public Health, Department of Environmental Health, Boston, MA 02115,  
21 USA

22 <sup>8</sup> Channing Division of Network Medicine, Department of Medicine, Brigham and Women's Hospital  
23 and Harvard Medical School, Boston, MA 02115, USA

24 <sup>9</sup> Center for Perinatal, Pediatric and Environmental Epidemiology, Yale University Schools of Public  
25 Health and Medicine, 1 Church Street, New Haven, CT, 06510, USA

26 <sup>10</sup> Yale School of Public Health, Department of Chronic Disease Epidemiology, 60 College St., New  
27 Haven, Connecticut 06510, USA

28 <sup>11</sup> Yale School of Public Health, Department of Biostatistics, 60 College St., New Haven, Connecticut  
29 06510, USA

30  
31  
32 **Number of pages: 9**

33 **Number of tables: 2**

34 **Number of figures: 1**

36 **Study Zip Code Selection and Participant Recruitment Criteria**

37 The study areas of Bradford County, Pennsylvania (PA) and Belmont and Monroe Counties, Ohio  
38 (OH) were selected based upon several criteria, including high number of unconventional oil and gas  
39 wells, low number of conventional wells, high proportion of domestic water well users, and prior oil  
40 and gas contamination events (e.g., <sup>1</sup>). We considered inclusion of Class II injection wells in our  
41 proximity metrics in addition to UOG wells, but there were none in our PA counties, only two in  
42 Belmont County, and zero in Monroe County. We used multiple outreach methods to recruit  
43 participants with a range of backgrounds and characteristics representative of the study area.  
44 Postcards with information about the study, the study phone number, and the study website were  
45 distributed by mail to every address within each eligible zip code. Flyers were posted at local  
46 businesses, and virtual ads were run on social media. Interested participants who responded to our  
47 recruitment methods were screened for eligibility via phone by study staff, and if eligible, scheduled  
48 for a home visit. Study eligibility consisted of being an adult household decision-maker ( $\geq 21$  years of  
49 age), able to communicate in English, and living in our selected counties in a home served by a  
50 private groundwater well or spring. The study protocol was approved by the Institutional Review Board  
51 of Yale University (HIC #2000021809) and reviewed and approved by the US Environmental  
52 Protection Agency (HSR-001162). All participants provided informed consent prior to data collection  
53 activities.

54

55 **Water Sampling and Analytical Methods**

56 Water samples were generally collected from outdoor spigots or hand pumps. Prior to sampling, the  
57 well or spring was purged until temperature, pH, conductivity, and dissolved oxygen were stable.  
58 Stability of the groundwater was assessed using either a YSI 556 Handheld Multiparameter  
59 Instrument or YSI Professional Plus with a flow through cell.

60

61 With respect to organic compounds, water samples analyzed for volatile organic compounds (VOC)  
62 were collected in precombusted clear glass vials containing 1 mL of 50% (v/v) hydrochloric acid (final

63 pH <2) with less than 0.5 mL of headspace and stored on ice at 4°C prior to analysis within four  
64 weeks. For analysis of VOCs, we followed U.S. Environmental Protection Agency (U.S. EPA) Method  
65 624, with minor modifications previously described by Getzinger et al.<sup>2</sup> Samples were collected and  
66 analyzed in triplicate, and the final reported value is the average of three samples. For the VOCs, limit  
67 of detection (LOD) and limit of quantification (LOQ) values were calculated for each compound.  
68 Values below the LOD were considered not detected, while measurements above the LOD including  
69 those between the LOD and LOQ were retained and reported. Values between the LOD and LOQ  
70 were calculated based on an extrapolation from the calibration curve. Chemicals were reported  
71 together as groups when their respective chromatographic peaks could not be differentiated.

72

73 With respect to inorganic elements and compounds, water samples analyzed for major cations, major  
74 anions, and trace elements were filtered in-line through 0.45 µm polyethersulfone filter membranes,  
75 collected in 125-mL acid-washed HDPE bottles, and stored at 4°C (major cations and trace elements)  
76 or frozen (major anions) until analysis.<sup>3</sup> Samples collected for trace element and major cation  
77 analyses were preserved with 50% v/v trace metal grade HNO<sub>3</sub> to a pH of less than 2.0. Major cations  
78 and dissolved iron concentrations were quantified by inductively coupled plasma emission  
79 spectrometry at the Cary Institute for Ecosystem Studies. Concentrations of major anions and  
80 remaining trace elements were determined at the Yale Analytical and Stable Isotope Center using ion  
81 chromatography and inductively coupled plasma mass spectrometry, respectively. The LOD for each  
82 chemical was defined using the standard deviation of measurements from field blank samples.

83

84

85

86

87

88

89 Table S1. Organic and inorganic compounds included in analysis.

| Compound Name                                   |
|-------------------------------------------------|
| Organic chemicals                               |
| 1,2-Dichloroethane and Benzene                  |
| 1,1-Dichloroethene and trans-1,2-Dichloroethene |
| 1,1,1,2-Tetrachloroethane                       |
| 1,1,1-Trichloroethane                           |
| 1,1,2,2-Tetrachloroethane                       |
| 1,1,2-Trichloroethane                           |
| 1,1-Dichloroethane                              |
| 1,1-Dichloropropene and Carbon Tetrachloride    |
| 1,2,3-Trichlorobenzene                          |
| 1,2,3-Trichloropropane                          |
| 1,2,4-Trichlorobenzene                          |
| 1,2,4-Trimethylbenzene                          |
| 1,2-Dibromo-3-chloropropane                     |
| 1,2-Dibromoethane                               |
| 1,2-Dichloropropane                             |
| 1,3,5-Trimethylbenzene                          |
| 1,3-Dichlorobenzene                             |
| 1,3-Dichloropropane                             |
| 1,4-Dichlorobenzene                             |
| 2,2-Dichloropropane and cis-1,2-Dichloroethene  |
| 2-Chlorotoluene                                 |
| 4-Chlorotoluene                                 |
| Bromobenzene                                    |
| Bromochloromethane                              |
| Bromodichloromethane                            |
| Bromomethane                                    |
| Chlorobenzene                                   |
| Chloroethane                                    |
| Chloroform                                      |

---

Chloromethane  
cis-1,3-Dichloropropene  
Dibromochloromethane  
Dibromomethane  
Ethylbenzene  
Hexachlorobutadiene  
Isopropylbenzene (cumene) and n-Propylbenzene  
Methylene Chloride (Dichloromethane)  
m-Xylene and p-Xylene  
Naphthalene  
n-Butylbenzene and 1,2-Dichlorobenzene  
o-Xylene, Styrene, Bromoform  
p-Isopropyltoluene (p-Cymene)  
sec-Butylbenzene  
tert-Butylbenzene  
Tetrachloroethene  
Toluene  
trans-1,3-Dichloropropene  
Trichloroethene  
Trichlorofluoromethane  
Vinyl chloride

#### Inorganic chemicals

Arsenic  
Barium  
Bromide  
Calcium  
Chloride  
Fluoride  
Iron  
Potassium  
Lithium

---

---

Magnesium

Manganese

Sodium

Nitrate

Lead

Sulfate

Strontium

Uranium

---

Table S2. Spearman correlation coefficients between concentrations of inorganic solutes and spatial metrics.

|           | Nearest  | IDW    | ID <sup>2</sup> W | IDW    | ID <sup>2</sup> W | ID <sub>ups</sub> | ID <sub>ups</sub> | ID <sub>ups</sub> | Sum    | Sum    |
|-----------|----------|--------|-------------------|--------|-------------------|-------------------|-------------------|-------------------|--------|--------|
|           | UOG well | 2 km   | 2 km              | 5 km   | 5 km              | 0.5 km            | 1 km              | 2 km              | 2 km   | 5 km   |
| Chemical  |          |        |                   |        |                   |                   |                   |                   |        |        |
| PA        |          |        |                   |        |                   |                   |                   |                   |        |        |
| Arsenic   | -0.01    | -0.02  | -0.03             | 0.06   | 0.00              | 0.05              | 0.08              | 0.07              | 0.03   | 0.09   |
| Barium    | -0.15    | 0.10   | 0.13              | 0.15   | 0.15              | 0.14              | 0.17*             | 0.12              | 0.09   | 0.14   |
| Bromide   | -0.09    | 0.16*  | 0.16*             | 0.06   | 0.11              | 0.27*             | 0.22*             | 0.17*             | 0.14   | 0.05   |
| Calcium   | 0.07     | -0.10  | -0.11             | -0.18* | -0.17*            | -0.10             | -0.05             | -0.06             | -0.05  | -0.21* |
| Chloride  | -0.25*   | 0.23*  | 0.24*             | 0.07   | 0.12              | 0.27*             | 0.24*             | 0.22*             | 0.23*  | 0.02   |
| Fluoride  | 0.07     | -0.06  | -0.07             | -0.04  | -0.05             | 0.03              | -0.05             | -0.05             | -0.08  | 0.00   |
| Iron      | 0.12     | -0.19* | -0.16*            | -0.26* | -0.20*            | -0.03             | -0.05             | -0.07             | -0.21* | -0.28* |
| Lead      | 0.00     | 0.00   | 0.00              | 0.05   | 0.05              | -0.02             | 0.06              | 0.12              | -0.01  | 0.02   |
| Lithium   | 0.02     | 0.00   | 0.00              | -0.04  | -0.04             | -0.03             | -0.03             | 0.00              | 0.04   | -0.04  |
| Magnesium | 0.18*    | -0.16* | -0.18*            | -0.25* | -0.24*            | -0.15             | -0.14             | -0.15             | -0.08  | -0.26* |
| Manganese | 0.22*    | -0.15  | -0.15             | -0.16* | -0.15             | -0.04             | -0.10             | -0.11             | -0.12  | -0.15  |
| Nitrate   | -0.11    | 0.02   | 0.02              | 0.13   | 0.08              | 0.01              | 0.07              | 0.11              | 0.02   | 0.16*  |
| Sodium    | 0.03     | 0.01   | 0.00              | -0.03  | -0.03             | 0.06              | 0.04              | 0.06              | 0.05   | -0.03  |
| Strontium | 0.01     | 0.01   | 0.01              | -0.11  | -0.07             | -0.01             | 0.01              | -0.01             | 0.04   | -0.14  |
| Sulfate   | 0.13     | -0.13  | -0.16*            | -0.23* | -0.22*            | -0.17*            | -0.12             | -0.12             | -0.06  | -0.24* |
| Uranium   | -0.05    | -0.01  | 0.00              | 0.13   | 0.08              | 0.03              | 0.11              | 0.16*             | -0.01  | 0.15   |
| OH        |          |        |                   |        |                   |                   |                   |                   |        |        |
| Barium    | 0.09     | -0.01  | -0.02             | -0.02  | -0.05             | 0.06              | 0.00              | -0.06             | -0.01  | -0.02  |
| Bromide   | 0.09     | -0.06  | -0.07             | -0.17* | -0.15             | 0.21*             | 0.03              | -0.06             | -0.06  | -0.15  |
| Calcium   | -0.07    | 0.06   | 0.07              | 0.06   | 0.07              | -0.02             | 0.04              | 0.01              | 0.06   | 0.09   |
| Chloride  | 0.06     | -0.05  | -0.07             | 0.02   | -0.03             | 0.11              | 0.05              | -0.06             | -0.04  | 0.10   |
| Fluoride  | 0.02     | -0.01  | -0.01             | -0.11  | -0.08             | 0.22*             | 0.06              | 0.02              | -0.02  | -0.11  |
| Iron      | -0.06    | 0.05   | 0.05              | 0.07   | 0.07              | 0.19              | 0.16*             | 0.09              | 0.03   | 0.08   |
| Lithium   | 0.00     | -0.02  | -0.01             | -0.07  | -0.03             | 0.04              | -0.03             | 0.02              | -0.02  | -0.05  |
| Magnesium | 0.00     | -0.03  | -0.02             | 0.00   | 0.00              | -0.09             | -0.04             | -0.03             | -0.02  | 0.08   |
| Manganese | -0.07    | 0.05   | 0.06              | -0.07  | 0.00              | 0.16*             | 0.10              | 0.07              | 0.04   | -0.10  |
| Nitrate   | -0.02    | 0.02   | 0.01              | 0.10   | 0.08              | -0.16*            | -0.04             | 0.03              | 0.02   | 0.06   |
| Sodium    | 0.07     | -0.11  | -0.10             | -0.20* | -0.16*            | 0.10              | -0.03             | -0.03             | -0.13  | -0.18* |
| Strontium | 0.01     | -0.04  | -0.03             | -0.08  | -0.06             | -0.01             | -0.08             | 0.01              | -0.03  | -0.02  |
| Sulfate   | -0.15    | 0.12   | 0.11              | 0.11   | 0.13              | -0.01             | 0.03              | 0.11              | 0.12   | 0.13   |

\* Statistically significant at the  $p < 0.05$  level.

Figure S1. Correlations between concentrations of organic chemicals and distance to nearest UOG well in PA (panel A) and OH (panel B).

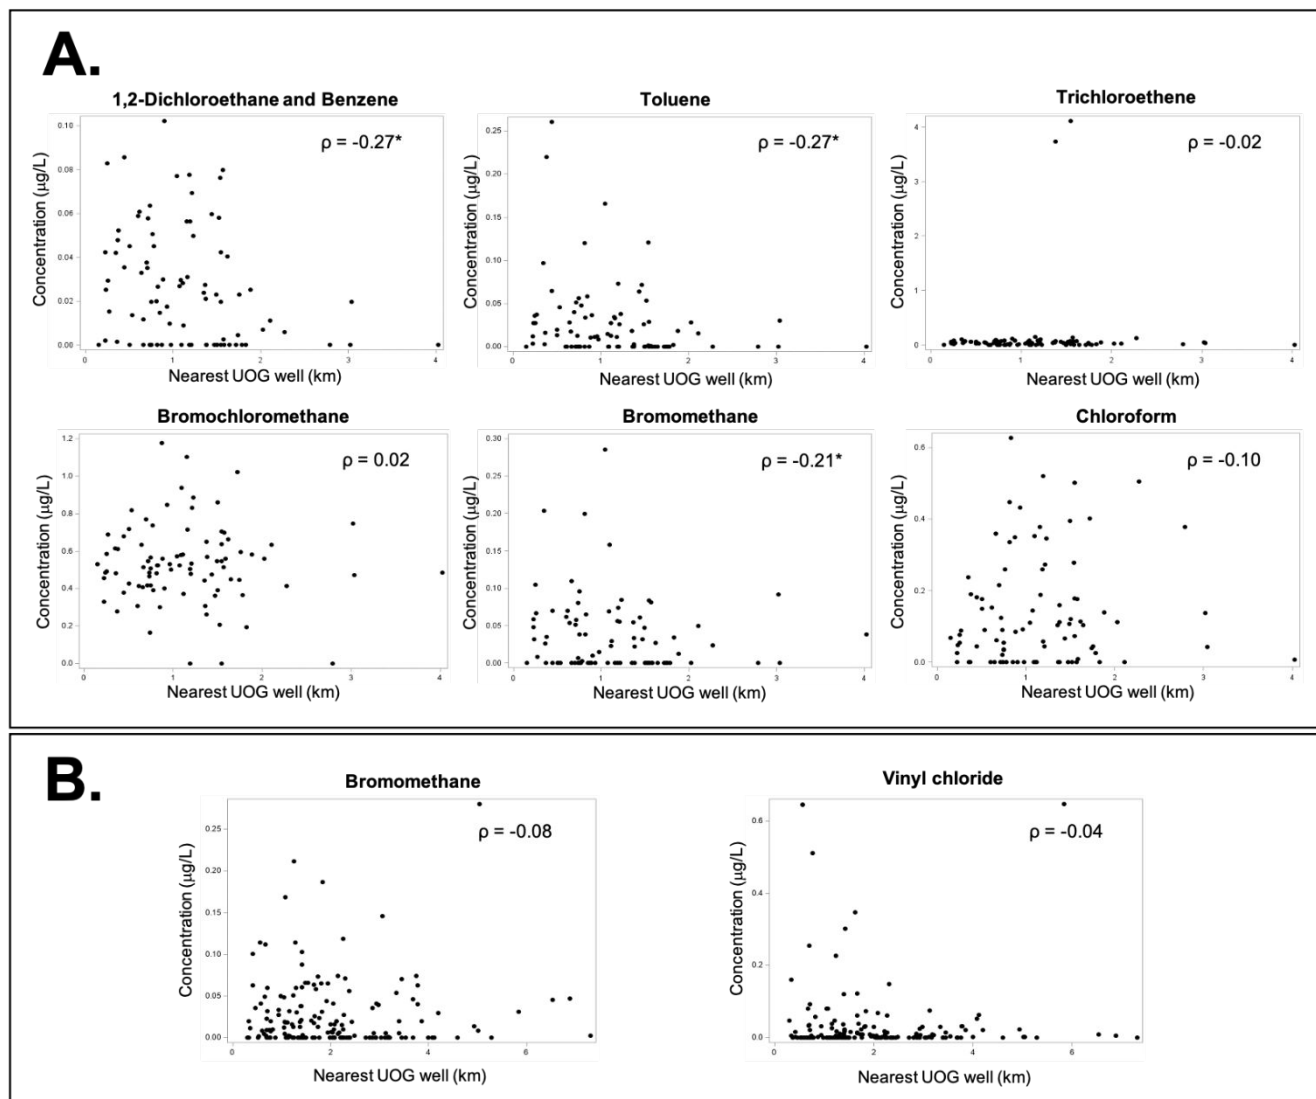

Scatterplots presented for organic compounds detected in at least 50% of samples. Statistically significant ( $p < 0.05$ ) correlations are denoted with an \*asterisk.



## References

1. Llewellyn, G. T.; Dorman, F.; Westland, J. L.; Yoxtheimer, D.; Grieve, P.; Sowers, T.; Humston-Fulmer, E.; Brantley, S. L., Evaluating a groundwater supply contamination incident attributed to Marcellus Shale gas development. **2015**, *112*, (20), 6325-6330.
2. Getzinger, G. J.; O'Connor, M. P.; Hoelzer, K.; Drollette, B. D.; Karatum, O.; Deshusses, M. A.; Ferguson, P. L.; Elsner, M.; Plata, D. L., Natural Gas Residual Fluids: Sources, Endpoints, and Organic Chemical Composition after Centralized Waste Treatment in Pennsylvania. *Environmental Science & Technology* **2015**, *49*, (14), 8347-8355.
3. Wilde, F. D. *Water-quality sampling by the U.S. Geological Survey-Standard protocols and procedures*; 2010-3121; 2010.
