# Supplementary material
Source: PubMed Central journal article supplement (PMC10259677)
Supplement: NIHMS1781877-supplement-Table_S1.pdf [file NIHMS1781877-supplement-Table_S1.pdf]

89 Table S1. Organic and inorganic compounds included in analysis.

| Compound Name                                   |
|-------------------------------------------------|
| Organic chemicals                               |
| 1,2-Dichloroethane and Benzene                  |
| 1,1-Dichloroethene and trans-1,2-Dichloroethene |
| 1,1,1,2-Tetrachloroethane                       |
| 1,1,1-Trichloroethane                           |
| 1,1,2,2-Tetrachloroethane                       |
| 1,1,2-Trichloroethane                           |
| 1,1-Dichloroethane                              |
| 1,1-Dichloropropene and Carbon Tetrachloride    |
| 1,2,3-Trichlorobenzene                          |
| 1,2,3-Trichloropropane                          |
| 1,2,4-Trichlorobenzene                          |
| 1,2,4-Trimethylbenzene                          |
| 1,2-Dibromo-3-chloropropane                     |
| 1,2-Dibromoethane                               |
| 1,2-Dichloropropane                             |
| 1,3,5-Trimethylbenzene                          |
| 1,3-Dichlorobenzene                             |
| 1,3-Dichloropropane                             |
| 1,4-Dichlorobenzene                             |
| 2,2-Dichloropropane and cis-1,2-Dichloroethene  |
| 2-Chlorotoluene                                 |
| 4-Chlorotoluene                                 |
| Bromobenzene                                    |
| Bromochloromethane                              |
| Bromodichloromethane                            |
| Bromomethane                                    |
| Chlorobenzene                                   |
| Chloroethane                                    |
| Chloroform                                      |

---

Chloromethane  
cis-1,3-Dichloropropene  
Dibromochloromethane  
Dibromomethane  
Ethylbenzene  
Hexachlorobutadiene  
Isopropylbenzene (cumene) and n-Propylbenzene  
Methylene Chloride (Dichloromethane)  
m-Xylene and p-Xylene  
Naphthalene  
n-Butylbenzene and 1,2-Dichlorobenzene  
o-Xylene, Styrene, Bromoform  
p-Isopropyltoluene (p-Cymene)  
sec-Butylbenzene  
tert-Butylbenzene  
Tetrachloroethene  
Toluene  
trans-1,3-Dichloropropene  
Trichloroethene  
Trichlorofluoromethane  
Vinyl chloride

#### Inorganic chemicals

Arsenic  
Barium  
Bromide  
Calcium  
Chloride  
Fluoride  
Iron  
Potassium  
Lithium

---

---

Magnesium

Manganese

Sodium

Nitrate

Lead

Sulfate

Strontium

Uranium

---
